# Supplementary material for: Gene Pyramiding of Peptidase Inhibitors Enhances Plant Resistance to the Spider Mite Tetranychus urticae
Source: PubMed Central journal article supplement (PMC3416837; doi:10.1371/journal.pone.0043011), 2012-08-10
Supplement: pone.0043011.s002.pdf [file pone.0043011.s002.pdf]

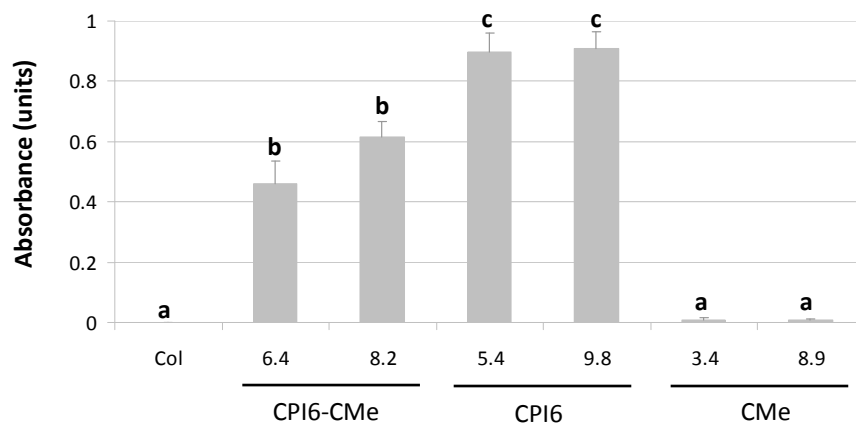

Figure S2
