# Supplementary material for: Gene Pyramiding of Peptidase Inhibitors Enhances Plant Resistance to the Spider Mite Tetranychus urticae
Source: PubMed Central journal article supplement (PMC3416837; doi:10.1371/journal.pone.0043011), 2012-08-10
Supplement: pone.0043011.s004.pdf [file pone.0043011.s004.pdf]

**Table S1.** Effects of the transgenic Arabidopsis lines on *T. urticae* development after feeding assay.

| <b>Arabidopsis lines</b> | <b><i>T. urticae</i> developing (days)<br/>Mean <math>\pm</math> SE</b> |
|--------------------------|-------------------------------------------------------------------------|
| Col                      | 6.7 $\pm$ 0.3 <sup>a</sup>                                              |
| CPI6-CMe 6.4             | 7.6 $\pm$ 0.4 <sup>a</sup>                                              |
| CPI6-CMe 8.2             | 8.0 $\pm$ 0.5 <sup>ab</sup>                                             |
| CPI6 6.4                 | 8.4 $\pm$ 0.3 <sup>ab</sup>                                             |
| CPI6 9.8                 | 7.4 $\pm$ 0.3 <sup>a</sup>                                              |
| CMe 3.4                  | 8.4 $\pm$ 0.3 <sup>ab</sup>                                             |
| CMe 8.9                  | 9.7 $\pm$ 0.4 <sup>b</sup>                                              |

Fifteen newborn larvae mites were placed on detached leaves from Arabidopsis lines and every day the emerged nymphs were counted. Results are expressed as mean  $\pm$  SE of 6 replicates of (independent plants) of every transgenic line and non-transformed control.

Different letters indicate significant differences ( $P < 0.05$ , Student-Newman-Keuls)
